# Supplementary material for: SARS-CoV-2 neutralizing antibodies: Longevity, breadth, and evasion by emerging viral variants
Source: PubMed Central journal article supplement (PMC8291755; doi:10.1371/journal.pmed.1003656), 2021-07-06
Supplement: pmed.1003656.s009.pdf [file pmed.1003656.s009.pdf]

**S1 Table.** Nomenclature of SARS-CoV-2 and emerging variants.

| <b>Virus</b> | <b>Other names*</b> | <b>Country first detected</b> | <b>WHO Nomenclature</b> | <b>GISAID code</b> |
|--------------|---------------------|-------------------------------|-------------------------|--------------------|
| D614         | 19A                 | China                         | N/A                     |                    |
| D614G        | B.1.319/19B         | China                         | N/A                     | NSW2713            |
| D614G/S477N  | 20F                 | Australia                     | N/A                     | NSW712             |
| B.1.1.7      | 20I                 | United Kingdom                | Alpha                   | NSW3878            |
| B.1.351      | 20H                 | South Africa                  | Beta                    | NSW3872            |
| B.1.1.28.1   | P1/20J              | Brazil                        | Gamma                   | NSW4318            |
| B.1.1.28.2   | P2                  | Brazil                        | Zeta                    | NSW-R0099          |

\* Pango lineage and clades

GISAID, Global Initiative on Sharing Avian Influenza Data; SARS-CoV-2: Severe Acute Respiratory Syndrome Coronavirus 2; WHO, World Health Organization.
